# Supplementary figures and images for: A Long-Term Study on the Bactericidal Effect of ZrN-Cu Nanostructured Coatings Deposited by an Industrial Physical Vapor Deposition System
Source: MDPI journal article supplement (doi:10.3390/nano14060496), 2024-03-10

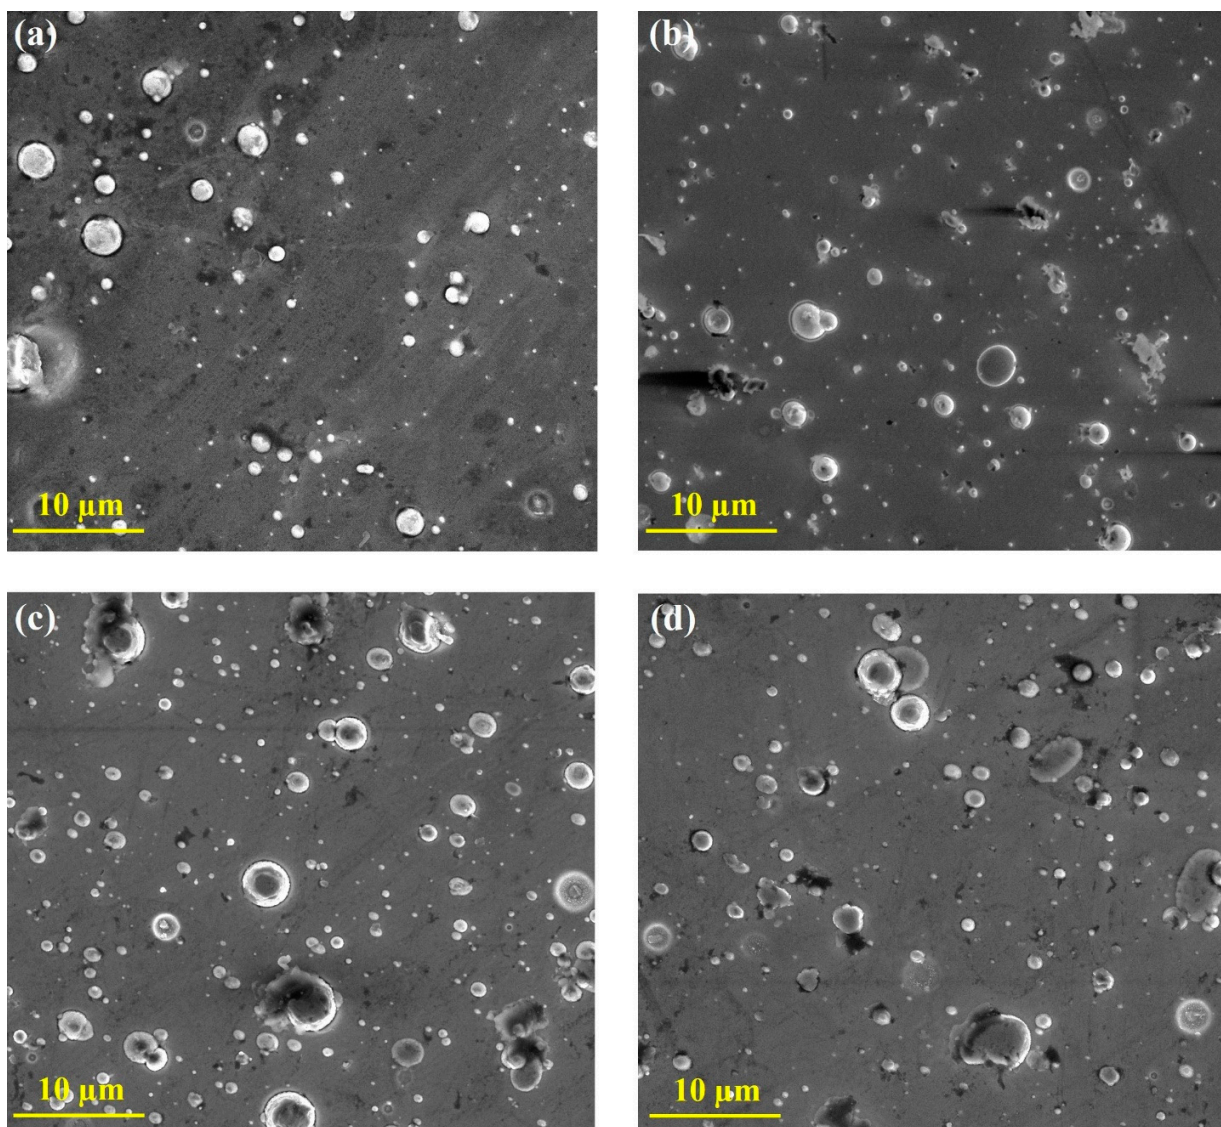

**Fig. S1.** SEM micrographs of as-deposited Cu11 (a), untouched Cu11 (b), as-deposited Cu25 (c) and untouched Cu25 (d)..

Supplement: s1 [file s1]
